# Supplementary material for: Mechanisms of Deamidation of Asparagine Residues and Effects of Main-Chain Conformation on Activation Energy
Source: Int J Mol Sci. 2020 Sep 24;21(19):7035. doi: 10.3390/ijms21197035 (PMC7582646; doi:10.3390/ijms21197035)
Supplement: Supplementary file 1 [file ijms-21-07035-s001.pdf]

## Supplementary Materials

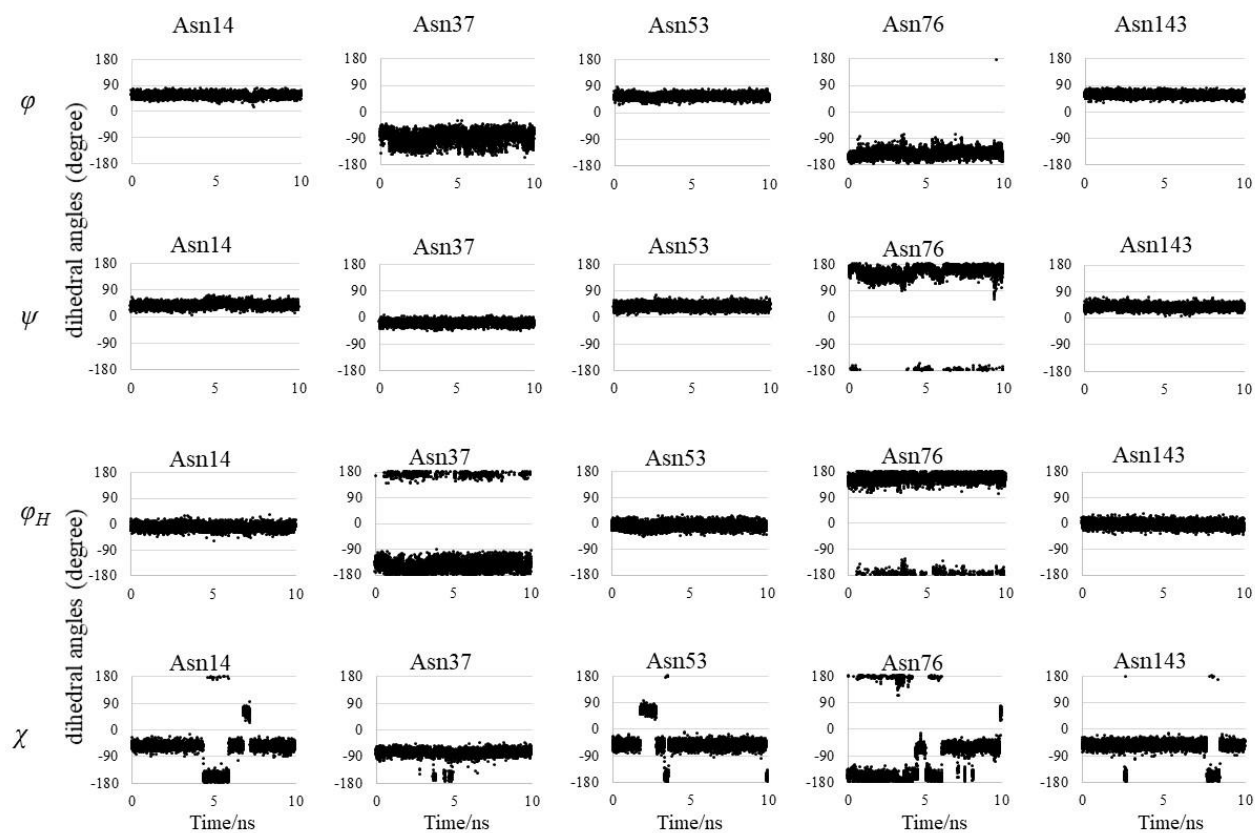

**Figure S1.** Dihedral angles of Asn residues in  $\gamma$ S-crystallin for the last 100 ns simulations.

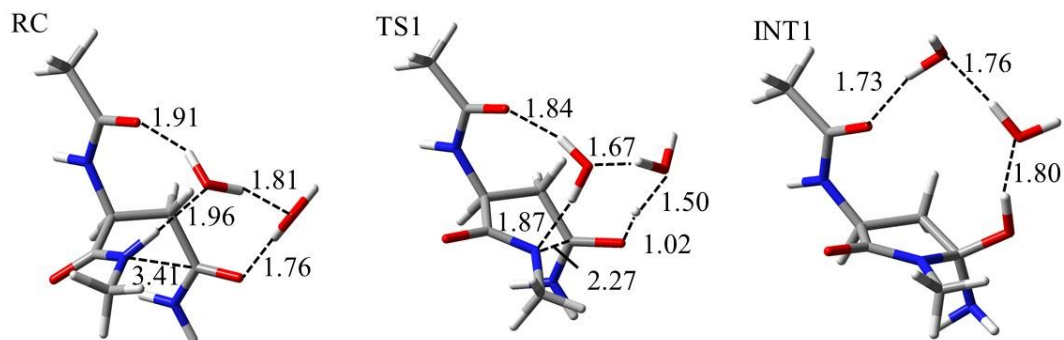

**Figure S2.** Optimized geometries of the cyclization step for syn conformation in a water-catalyzed reaction. Carbon, nitrogen, oxygen, and phosphorus atoms are illustrated in gray, blue, red, and orange, respectively. Selected interatomic distances are in Å.

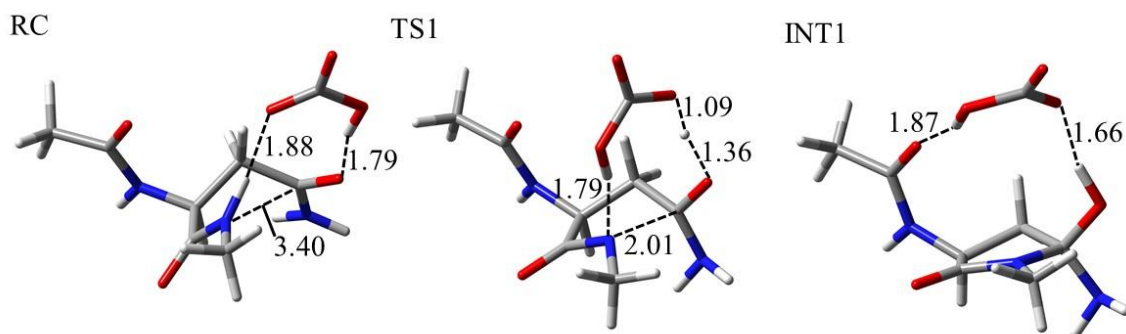

**Figure S3.** Optimized geometries of the cyclization step for the syn conformation in carbonate-catalyzed reaction. Carbon, nitrogen, oxygen, and phosphorus atoms are illustrated in gray, blue, red, and orange, respectively. Selected interatomic distances are in Å.

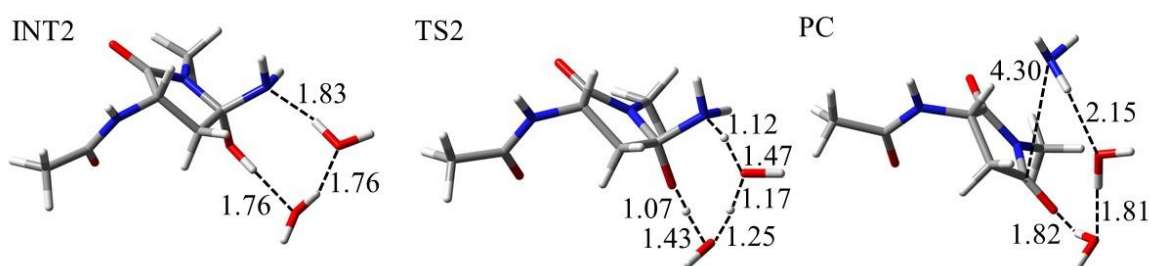

**Figure S4.** Optimized geometries of deammoniation step for syn conformation in water-catalyzed reaction. Carbon, nitrogen, oxygen, and phosphorus atoms are illustrated in gray, blue, red, and orange, respectively. Selected interatomic distances are in Å.

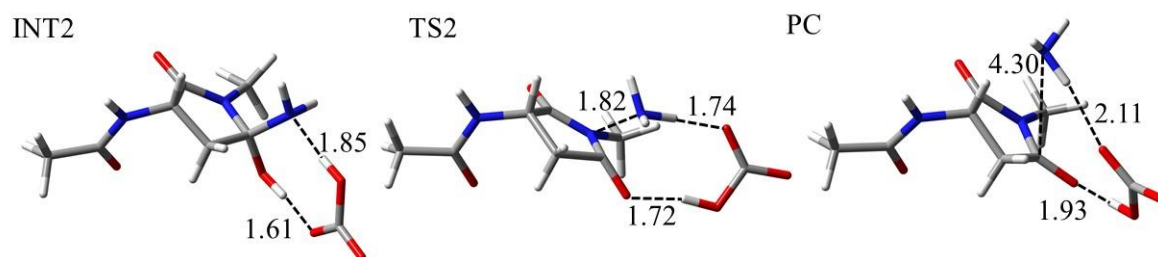

**Figure S5.** Optimized geometries of deammoniation step for syn conformation in carbonate-catalyzed reaction. Carbon, nitrogen, oxygen, and phosphorus atoms are illustrated in gray, blue, red, and orange, respectively. Selected interatomic distances are in Å.

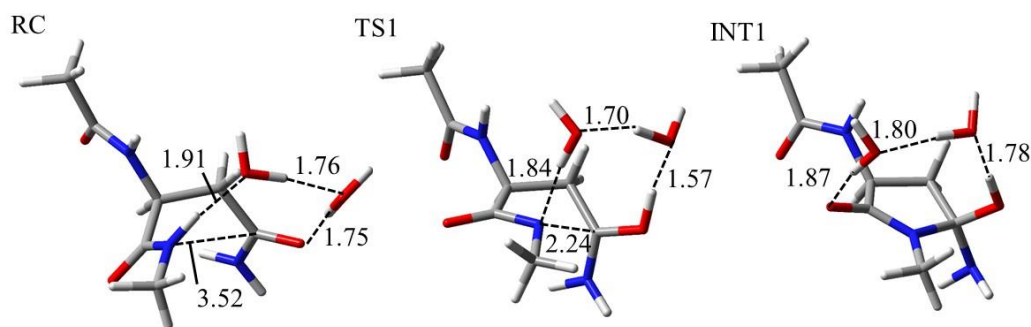

**Figure S6.** Optimized geometries of cyclization step for anti conformation in water-catalyzed reaction. Carbon, nitrogen, oxygen, and phosphorus atoms are illustrated in gray, blue, red, and orange, respectively. Selected interatomic distances are in Å.

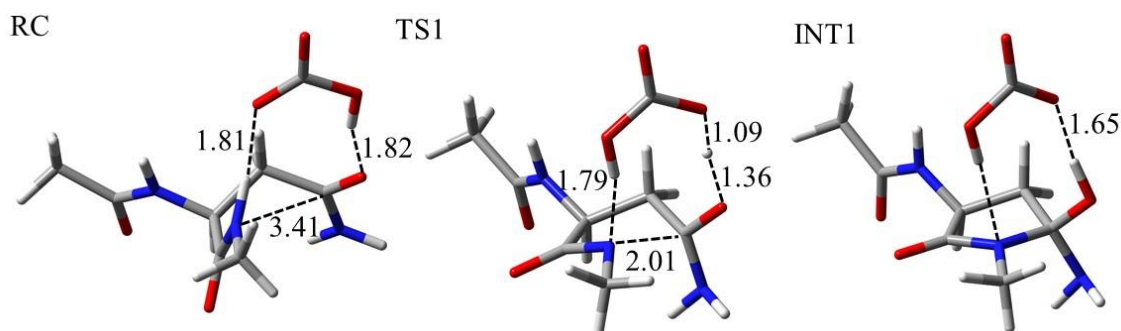

**Figure S7.** Optimized geometries of cyclization step for anti conformation in carbonate-catalyzed reaction. Carbon, nitrogen, oxygen, and phosphorus atoms are illustrated in gray, blue, red, and orange, respectively. Selected interatomic distances are in Å.

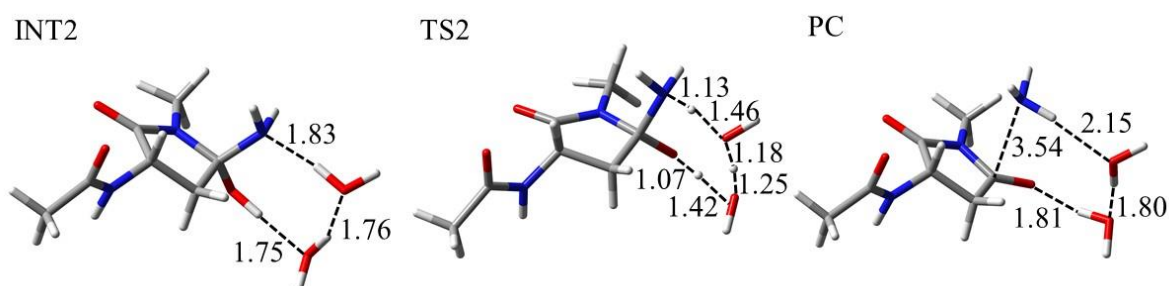

**Figure S8.** Optimized geometries of deammoniation step for anti conformation in water-catalyzed reaction. Carbon, nitrogen, oxygen, and phosphorus atoms are illustrated in gray, blue, red, and orange, respectively. Selected interatomic distances are in Å.

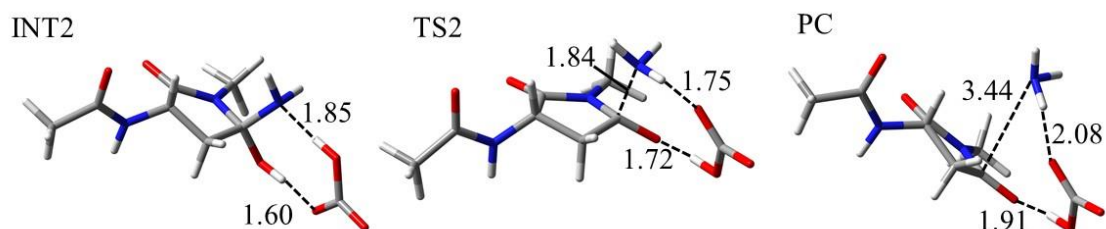

**Figure S9.** Optimized geometries of deammoniation step for anti conformation in carbonate-catalyzed reaction. Carbon, nitrogen, oxygen, and phosphorus atoms are illustrated in gray, blue, red, and orange, respectively. Selected interatomic distances are in Å.

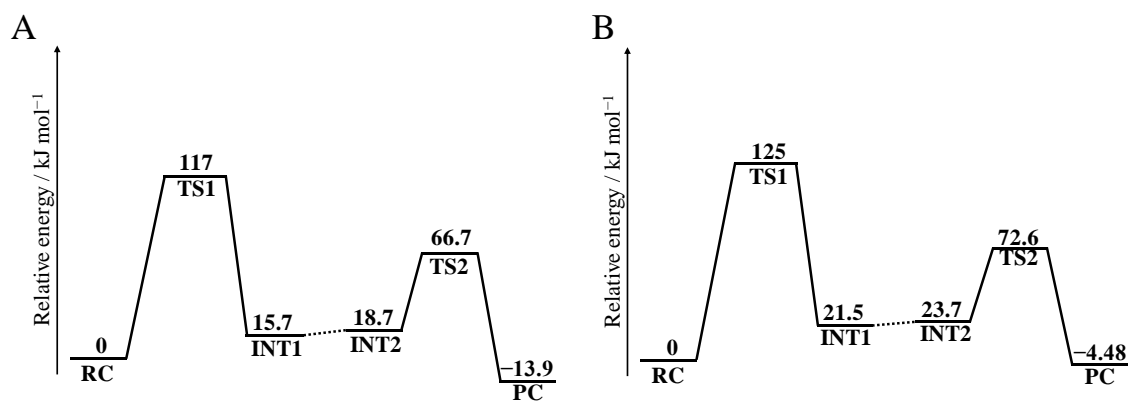

**Figure S10.** Relative energy profiles calculated using MP2/6-311+G(2d,2p)//B3LYP/6-31+G(d,p) level. Entire energy profiles of (A) syn and (B) anti conformation in the water-catalyzed reaction.
